# Supplementary material for: Polymerization of polycarbosilanes in high internal phase emulsions for the synthesis of macroporous silicon carbide catalysts (polyHIPE-SiC)
Source: Royal Society of Chemistry journal article supplement (doi:10.1039/c1jm10612k), 2011-01-01
Supplement: c1jm10612k.pdf [file c1jm10612k.pdf]

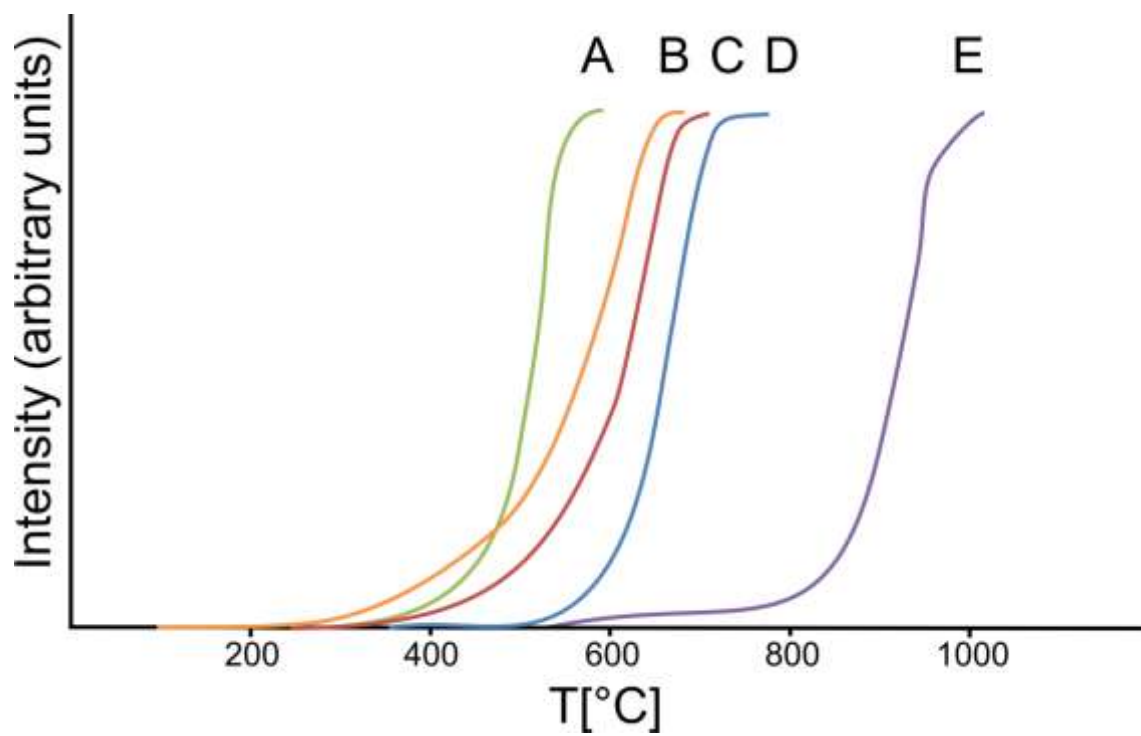

Figure A1: Temperature programmed oxidation of methane performed with A) pure ceria, B) A100-C30, C) A100-C10, D) A100-C05 and E) the empty sample cell.
